# Supplementary material
Source: MDPI journal article supplement (https://www.mdpi.com/2071-1050/12/9/3878)
Supplement: s1 [file s1]

Archive with 2 entries (2 files):
- Gif_S1.gif
- sustainability-12-03878-s001.pdf
