# Supplementary material
Source: MDPI journal article supplement (https://www.mdpi.com/2071-1050/12/9/3878)

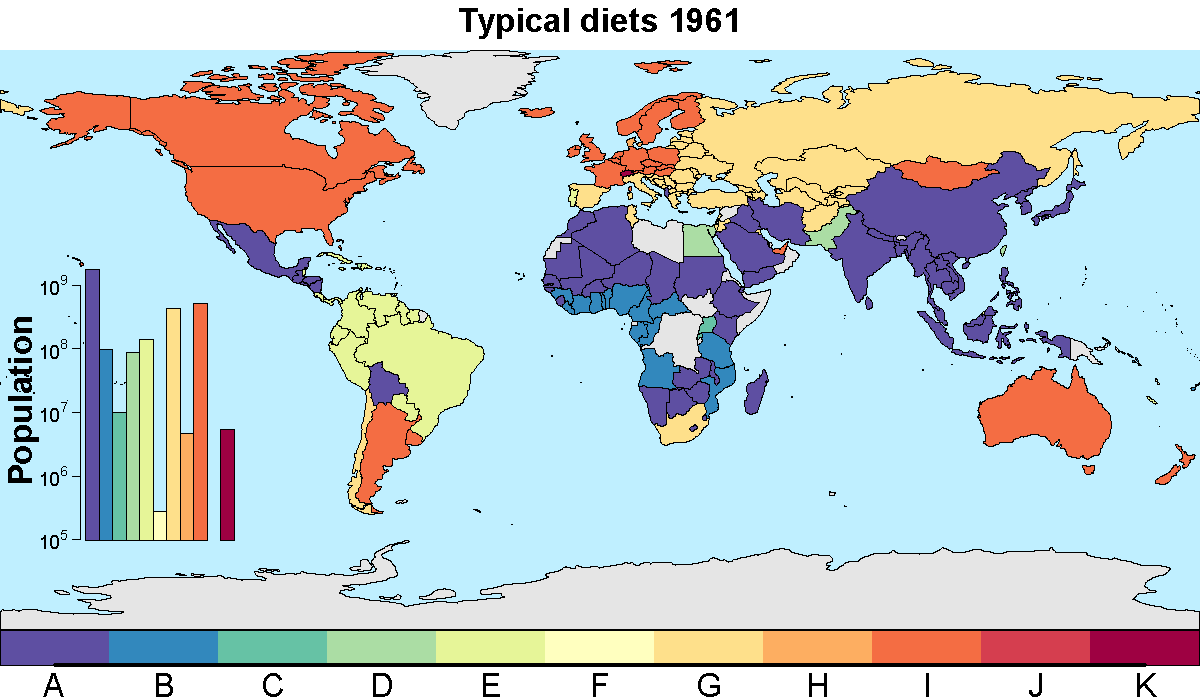

Supplement: s1 [file s1 › Gif_S1.gif]
